# Supplementary material for: Management of Secondary Metabolite Synthesis and Biomass in Basil (Ocimum basilicum L.) Microgreens Using Different Continuous-Spectrum LED Lights
Source: MDPI journal article supplement (doi:10.3390/plants13101394), 2024-05-17
Supplement: s1 [file s1]

**Table S1.** Concentrations of Hoagland's nutrient solution (1938).

| Consumption Nutrients | Concentration (mg L <sup>-1</sup> ) | Consumption Nutrients | Concentration (mg L <sup>-1</sup> ) |
|-----------------------|-------------------------------------|-----------------------|-------------------------------------|
| N                     | 210                                 | Fe                    | 3                                   |
| K                     | 235                                 | B                     | 0.5                                 |
| Ca                    | 200                                 | Mn                    | 0.5                                 |
| P                     | 31                                  | Zn                    | 0.05                                |
| S                     | 64                                  | Cu                    | 0.02                                |
| Mg                    | 48                                  | Mo                    | 0.01                                |
